# Supplementary material for: Population Genetics of Paramecium Mitochondrial Genomes: Recombination, Mutation Spectrum, and Efficacy of Selection
Source: PubMed Central journal article supplement — Genome Biol Evol. 2019 Apr 13;11(5):1398–416. doi: 10.1093/gbe/evz081 (PMC6505448; doi:10.1093/gbe/evz081), 2019-04-13
Supplement: evz081_supp.pdf [file evz081_supp.pdf]

# Supplementary Materials

## Supplementary Figures

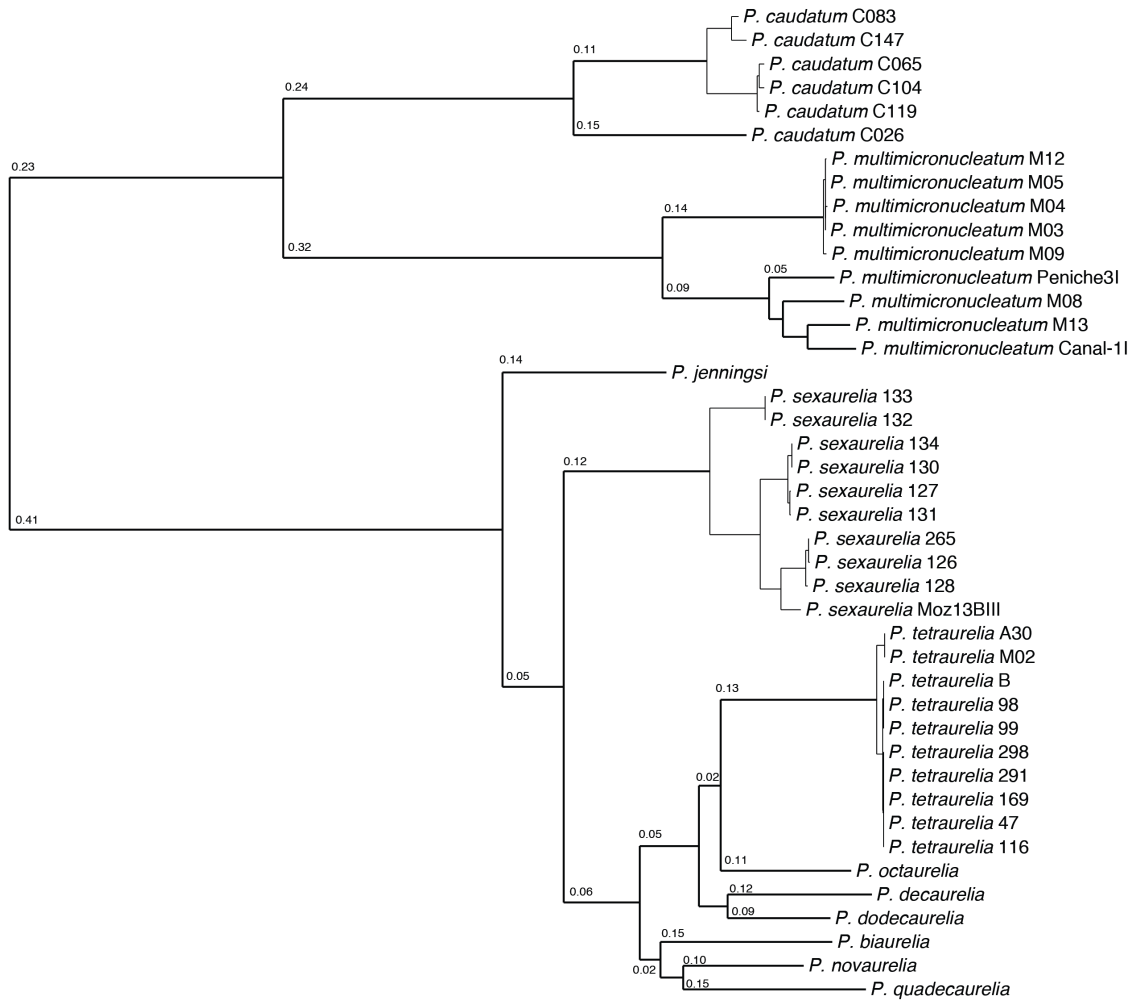

**Supplementary Figure 1: Mitochondrial phylogeny of the Paramecium genus including individual isolates within each species.** The phylogeny is built based on sequence variants identified by mapping reads to the reference genome for each species (rather than using *de novo* assemblies), and was built using RAXML (version 8.2.11), under the substitution model GTRGAMMA. Numbers on branches indicate total number of substitutions per site.

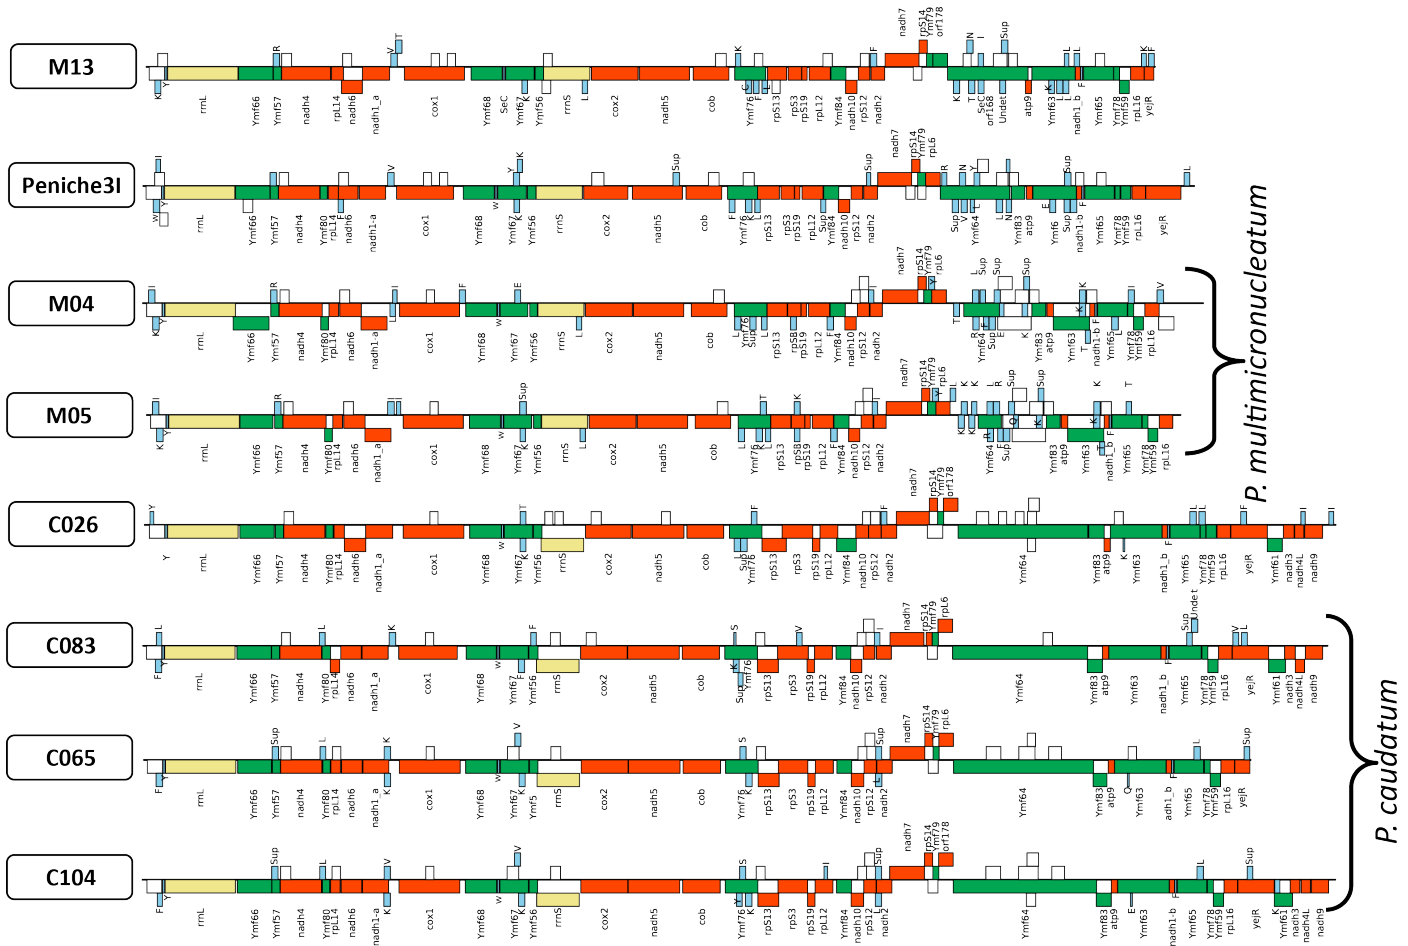

Supplementary Figure 2: Mitochondrial genomes of isolates belonging to the *P. caudatum* and *P. multimicronucleatum* outgroup lineages. Red: protein coding genes; white: novel predicted ORFs longer than 100aa; yellow: ribosomal RNAs; blue: tRNAs. Top layers: forward-strand genes; bottom layers: reverse-strand genes.

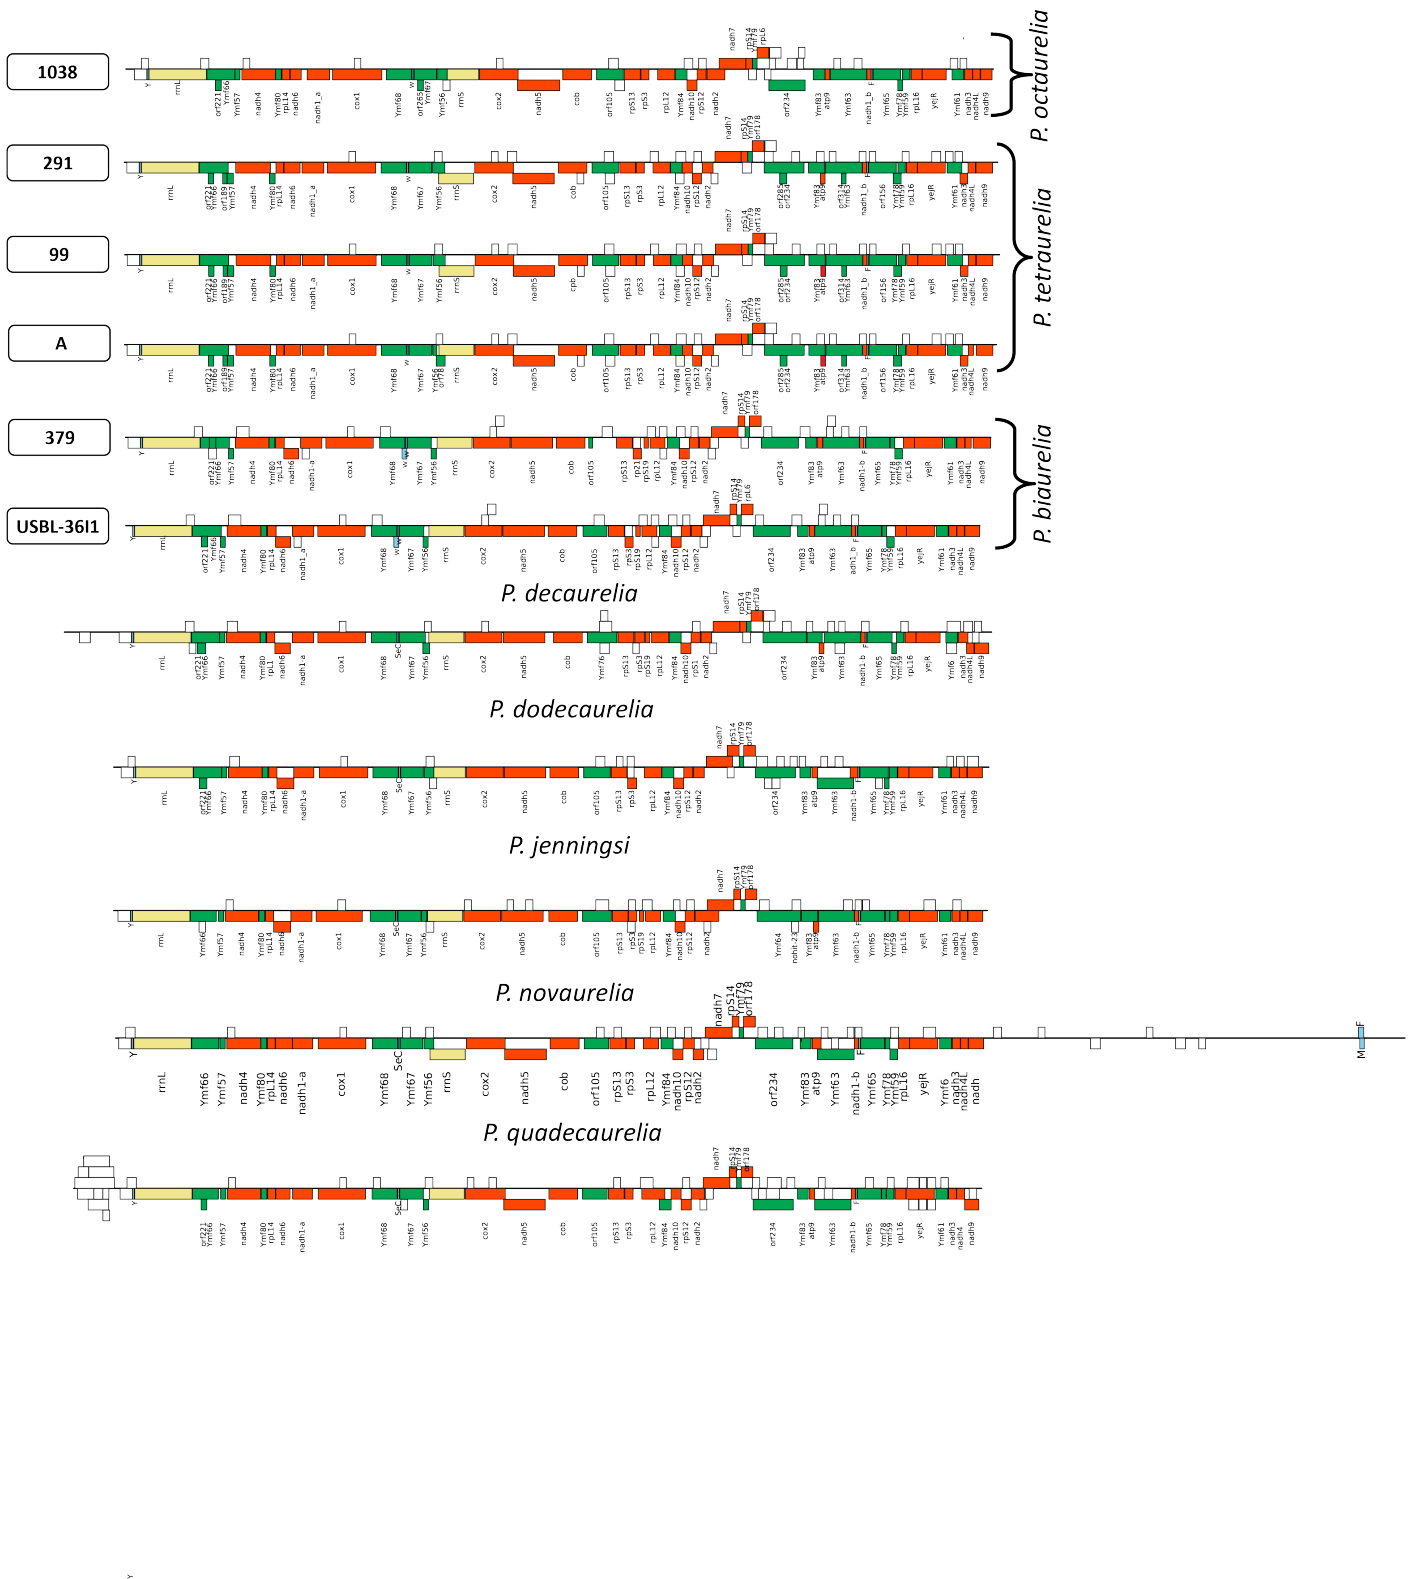

Supplementary Figure 3: Mitochondrial genomes of isolates belonging to the *P. aurelia* species complexes (except for *P. sexaurelia*, shown in the next figure). Red: protein coding genes; white: novel predicted ORFs longer than 100aa; yellow: ribosomal RNAs; blue: tRNAs. Top layers: forward-strand genes; bottom layers: reverse-strand genes.

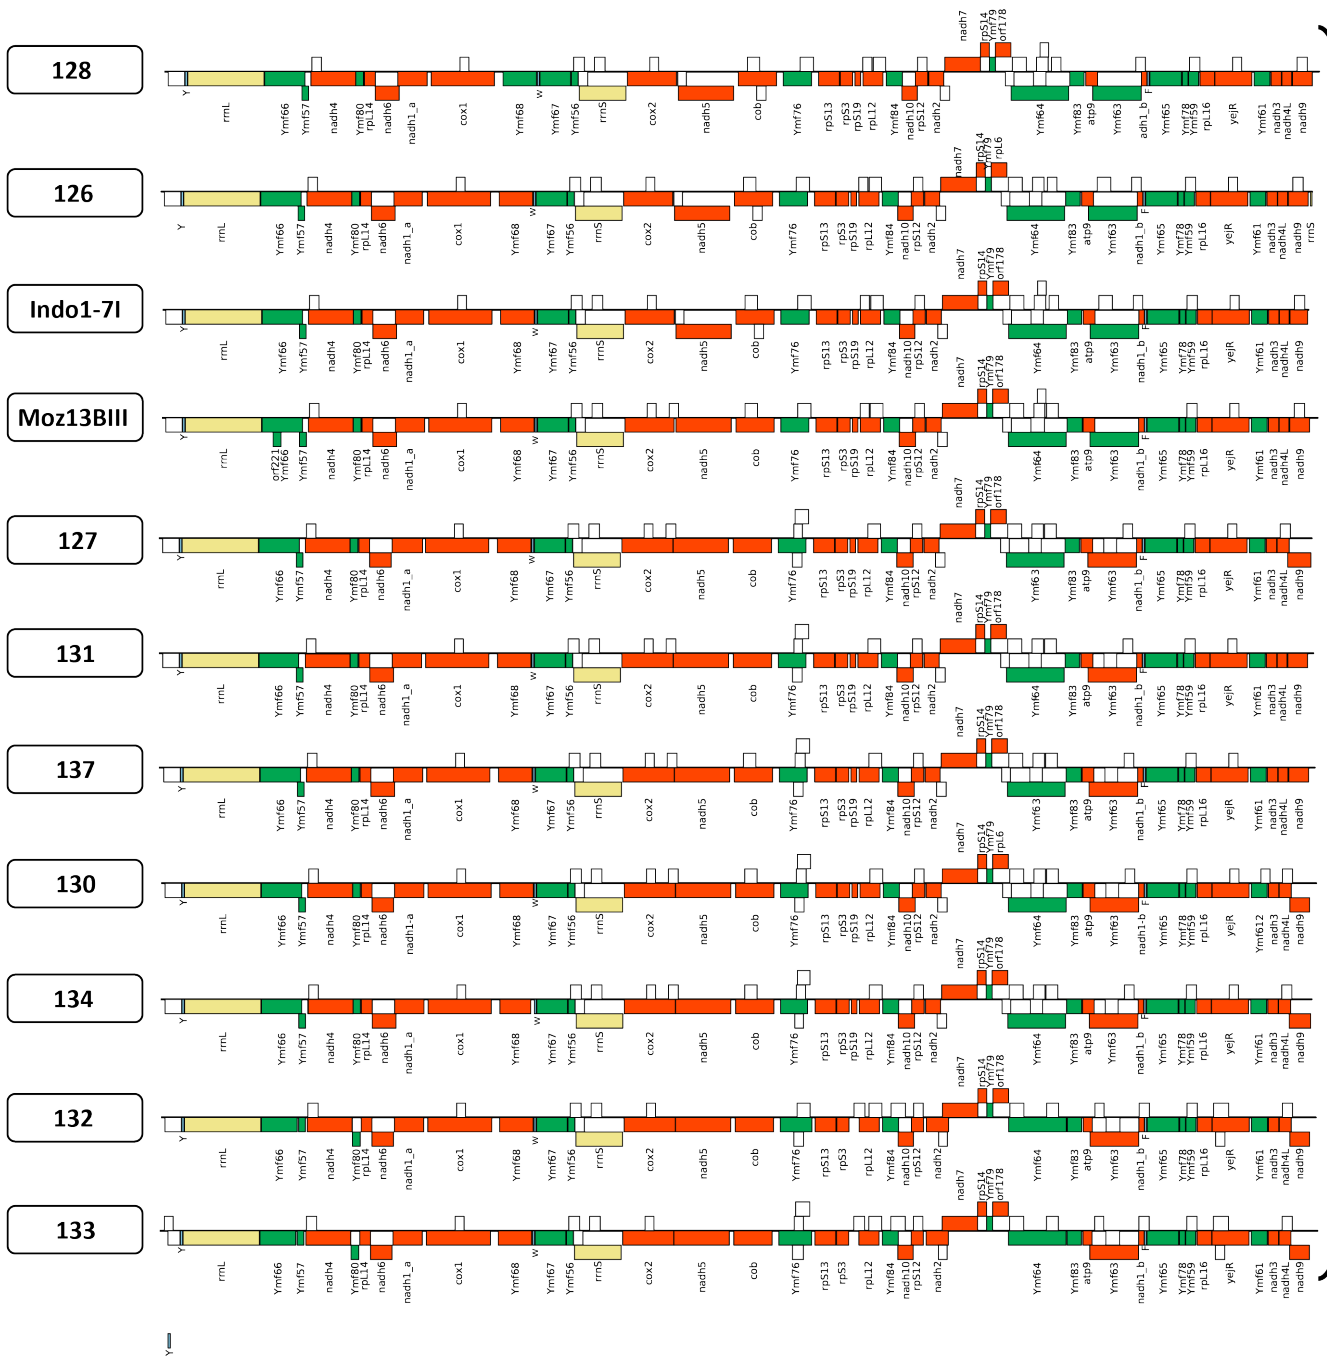

**Supplementary Figure 4: Mitochondrial genomes of isolates belonging to *P. sexaurelia*.** Red: protein coding genes; white: novel predicted ORFs longer than 100aa; yellow: ribosomal RNAs; blue: tRNAs. Top layers: forward-strand genes; bottom layers: reverse-strand genes.

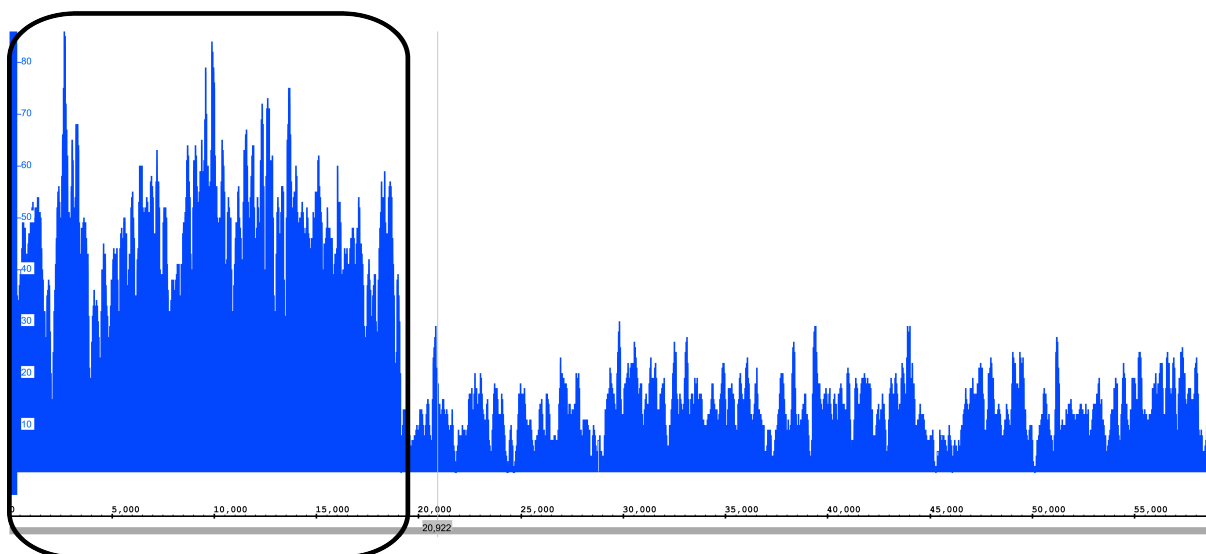

**Supplementary Figure 5: Raw mitogenome assembly and sequencing read coverage for *P. novaurelia*.** An ~19kb 3' extension is present in the raw assembly. However, read coverage over that region is significantly higher than what is observed over the rest of the mitochondrial genome, thus the two regions most likely exist in different copy numbers and the extension might be the result of missassembly. See also Figure 3. Raw sequencing reads were mapped to the assembled mitogenome using Bowtie (Langmead et al. 2009).

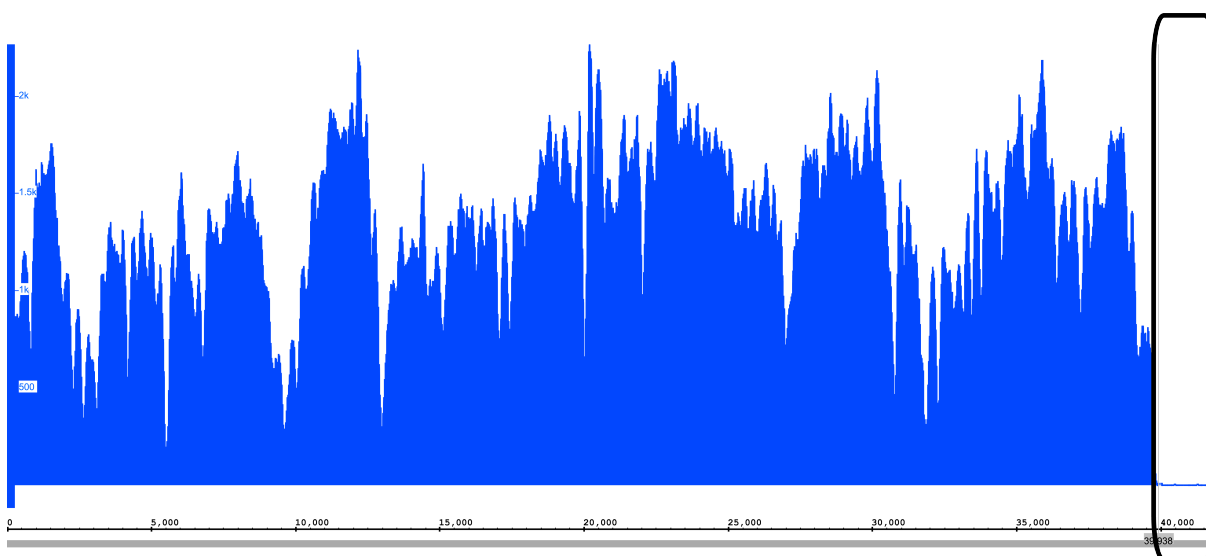

**Supplementary Figure 6: Raw mitogenome assembly and sequencing read coverage for *P. quadecaurelia*.** A small 5' extension is present in the raw assembly. However, read coverage over that region is very low relative to what is observed over the rest of the mitochondrial genome, thus the extension is probably be the result of missassembly. See also Figure 3. Raw sequencing reads were mapped to the assembled mitogenome using Bowtie (Langmead et al. 2009).

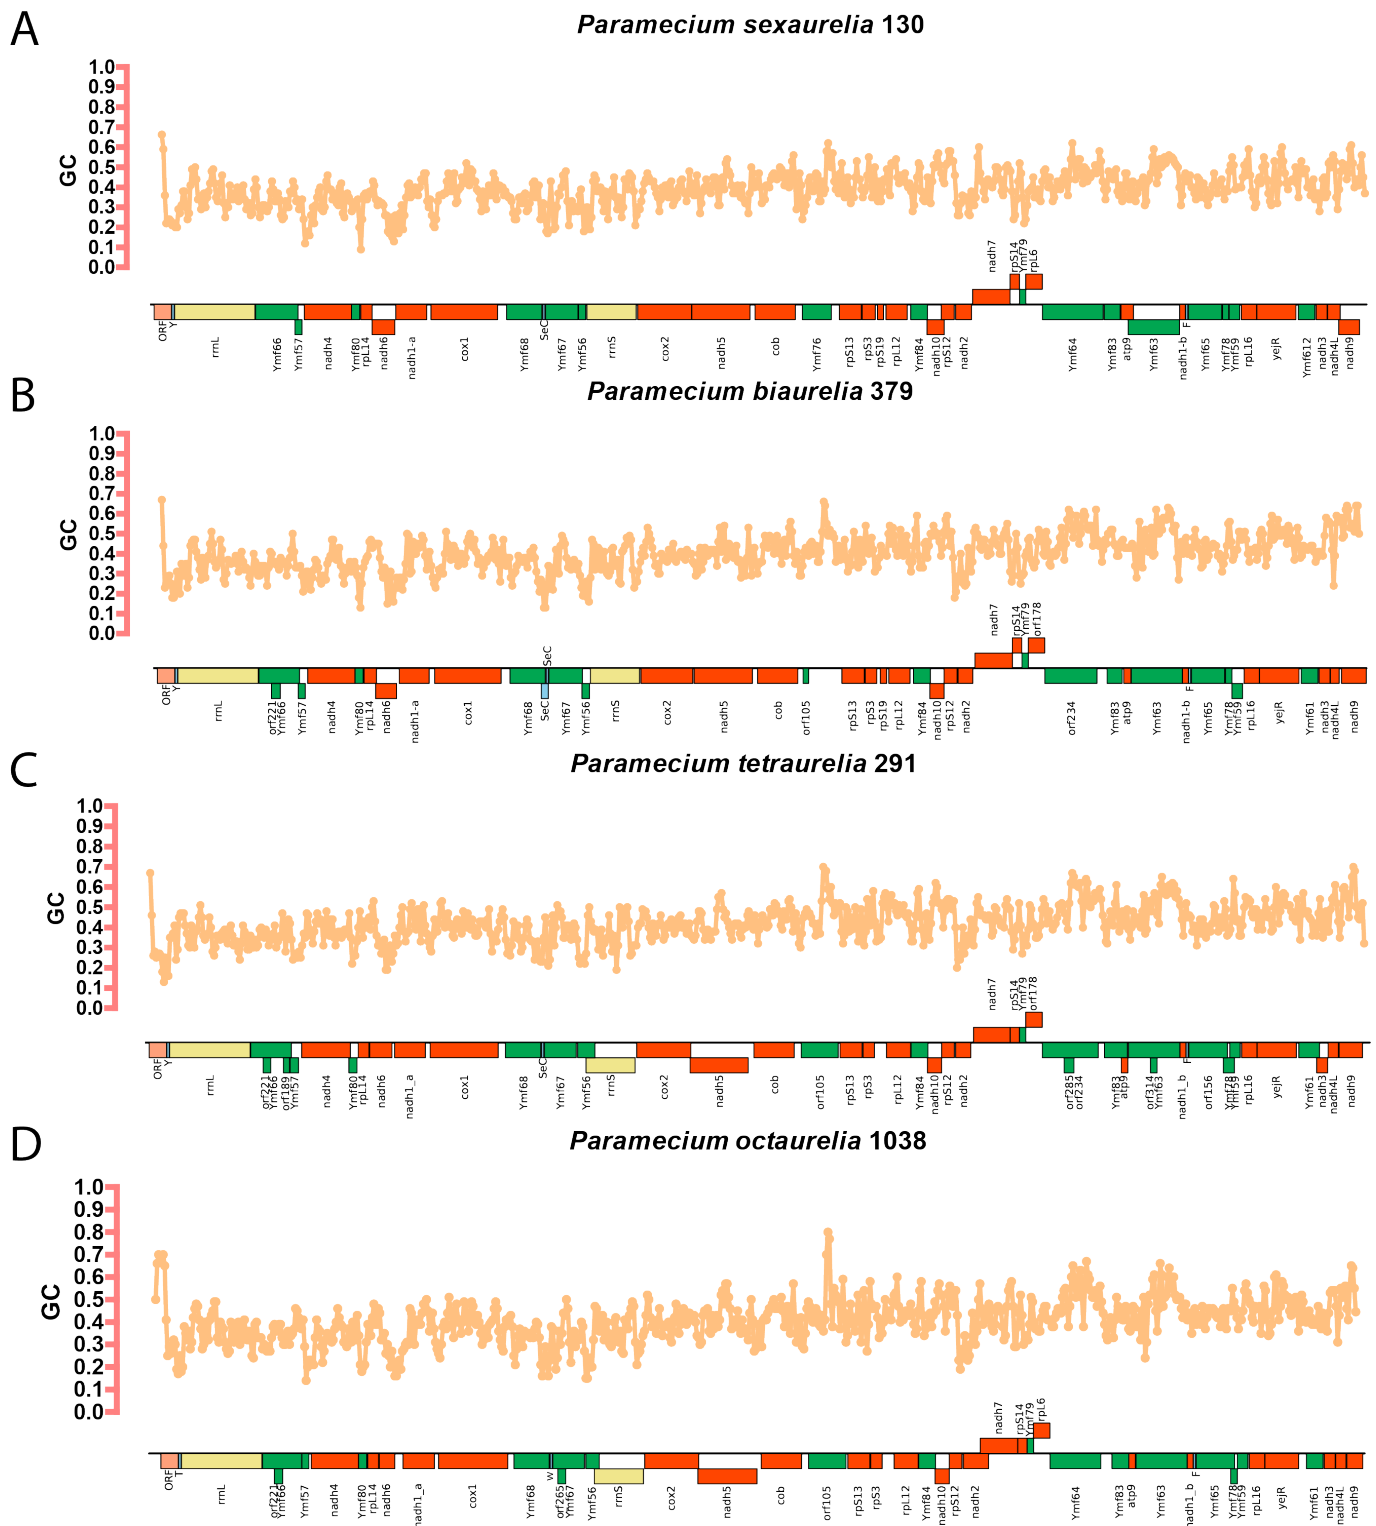

**Supplementary Figure 7: GC content in *P. aurelia* species.** Shown is the 100bp average of the GC content along the mitochondrial chromosome.







| Protein      | <i>P. multimi cronucle atum</i> |           | <i>P. caudatum</i> |     |       | <i>P. biaurelia</i> |       | <i>P. tetraurelia</i> |     |           | <i>P. sexaurelia</i> |     |     |     |     |     |     |     |     |     |     |     |          |           |                      |                      |                      |                        |                       |                     |     |
|--------------|---------------------------------|-----------|--------------------|-----|-------|---------------------|-------|-----------------------|-----|-----------|----------------------|-----|-----|-----|-----|-----|-----|-----|-----|-----|-----|-----|----------|-----------|----------------------|----------------------|----------------------|------------------------|-----------------------|---------------------|-----|
|              | M13                             | Peniche31 | M04                | M05 | C026  | C065                | C083  | C104                  | 379 | USBL-3611 | 291                  | 99  | A   | 126 | 127 | 128 | 130 | 131 | 132 | 133 | 134 | 137 | Indo1-71 | Moz13BIII | <i>P. octaurelia</i> | <i>P. novaurelia</i> | <i>P. decaurelia</i> | <i>P. dodecaurelia</i> | <i>P. quadaurelia</i> | <i>P. jenningsi</i> |     |
| atp9         | 75                              | 75        | 80                 | 80  | 78    | 77                  | 77    | 77                    | 78  | 78        | 72                   | 72  | 72  | 136 | 136 | 136 | 136 | 136 | 104 | 104 | 136 | 136 | 136      | 136       | 72                   | 136                  | 75                   | 86                     | 80                    | 85                  |     |
| cob          | 444                             | 444       | 444                | 444 | 457   | 466                 | 463   | 466                   | 442 | 442       | 442                  | 442 | 430 | 442 | 442 | 442 | 442 | 442 | 442 | 442 | 442 | 442 | 442      | 442       | 442                  | 442                  | 442                  | 442                    | 442                   | 442                 |     |
| cox1         | 747                             | 709       | 746                | 747 | 757   | 757                 | 728   | 757                   | 729 | 729       | 746                  | 746 | 746 | 729 | 729 | 729 | 729 | 729 | 739 | 739 | 729 | 729 | 729      | 729       | 813                  | 729                  | 733                  | 748                    | 728                   | 711                 |     |
| cox2         | 579                             | 550       | 582                | 582 | 567   | 584                 | 580   | 584                   | 567 | 567       | 594                  | 594 | 594 | 567 | 591 | 567 | 591 | 591 | 591 | 591 | 591 | 591 | 591      | 567       | 592                  | 591                  | 567                  | 567                    | 613                   | 567                 |     |
| nadh10       | 141                             | 141       | 141                | 141 | 157   | 157                 | 141   | 157                   | 156 | 156       | 156                  | 156 | 156 | 178 | 189 | 178 | 189 | 189 | 177 | 177 | 189 | 189 | 178      | 189       | 156                  | 156                  | 156                  | 156                    | 156                   | 156                 |     |
| nadh1-a      | 338                             | 327       | 325                | 325 | 336   | 323                 | 323   | 323                   | 328 | 328       | 336                  | 336 | 336 | 327 | 352 | 339 | 339 | 339 | 338 | 338 | 339 | 339 | 327      | 339       | 345                  | 307                  | 330                  | 310                    | 303                   | 326                 |     |
| nadh1-b      | 63                              | 63        | 61                 | 61  | 64    | 63                  | 63    | 63                    | 64  | 64        | 64                   | 64  | 64  | 63  | 63  | 63  | 63  | 63  | 63  | 63  | 63  | 63  | 63       | 63        | 63                   | 64                   | 64                   | 64                     | 63                    | 63                  |     |
| nadh2        | 170                             | 170       | 154                | 154 | 191   | 186                 | 186   | 191                   | 162 | 162       | 166                  | 166 | 166 | 173 | 173 | 173 | 173 | 173 | 257 | 257 | 173 | 173 | 173      | 173       | 276                  | 162                  | 162                  | 162                    | 205                   | 367                 |     |
| nadh3        | nd                              | nd        | nd                 | nd  | 134   | nd                  | 132   | 120                   | 120 | 120       | 120                  | 120 | 120 | 120 | 120 | 120 | 120 | 120 | 120 | 120 | 120 | 120 | 120      | 120       | 120                  | 120                  | 145                  | 120                    | 120                   | 120                 |     |
| nadh4        | 607                             | 512       | 536                | 536 | 512   | 512                 | 518   | 512                   | 517 | 514       | 534                  | 534 | 520 | 514 | 517 | 517 | 517 | 517 | 517 | 517 | 517 | 517 | 517      | 517       | 517                  | 517                  | 517                  | 517                    | 517                   | 512                 |     |
| nadh4L       | nd                              | nd        | nd                 | nd  | 115   | nd                  | 115   | 115                   | 96  | 113       | 113                  | 113 | 78  | 113 | 139 | 113 | 139 | 139 | 139 | 139 | 139 | 113 | 113      | 113       | 113                  | 113                  | 113                  | 113                    | 113                   | 113                 | 113 |
| nadh5        | 622                             | 622       | 627                | 627 | 641   | 641                 | 641   | 641                   | 638 | 638       | 637                  | 637 | 637 | 638 | 638 | 638 | 638 | 638 | 638 | 638 | 638 | 638 | 638      | 638       | 648                  | 638                  | 638                  | 638                    | 638                   | 638                 |     |
| nadh6        | 259                             | 243       | 266                | 266 | 267   | 318                 | 256   | 256                   | 230 | 230       | 245                  | 245 | 245 | 275 | 249 | 275 | 249 | 275 | 249 | 249 | 275 | 275 | 275      | 275       | 170                  | 254                  | 238                  | 263                    | 221                   | 262                 |     |
| nadh7        | 423                             | 423       | 442                | 442 | 411   | 433                 | 423   | 433                   | 411 | 411       | 400                  | 400 | 400 | 411 | 411 | 411 | 411 | 411 | 411 | 411 | 411 | 411 | 411      | 411       | 411                  | 411                  | 411                  | 411                    | 411                   | 411                 |     |
| nadh9        | nd                              | nd        | nd                 | nd  | 223   | nd                  | 215   | 215                   | 270 | 229       | 256                  | 256 | 256 | 229 | 269 | 229 | 229 | 229 | 229 | 229 | 249 | 229 | 229      | 229       | 175                  | 229                  | 218                  | 229                    | 218                   | 229                 |     |
| rp12         | 262                             | 262       | 262                | 262 | 223   | 223                 | 223   | 223                   | 232 | 232       | 265                  | 265 | 265 | 232 | 232 | 232 | 232 | 232 | 232 | 232 | 232 | 232 | 232      | 232       | 265                  | 232                  | 265                  | 265                    | 356                   | 232                 |     |
| rp14         | 150                             | 125       | 119                | 119 | 128   | 119                 | 119   | 119                   | 134 | 134       | 119                  | 119 | 119 | 125 | 125 | 125 | 125 | 125 | 125 | 125 | 125 | 125 | 125      | 125       | 119                  | 119                  | 125                  | 128                    | 119                   | 125                 |     |
| rp16         | 168                             | 168       | 178                | 168 | 168   | 168                 | 168   | 168                   | 168 | 168       | 168                  | 168 | 168 | 168 | 168 | 168 | 168 | 168 | 168 | 168 | 168 | 168 | 168      | 168       | 168                  | 168                  | 168                  | 168                    | 168                   | 168                 | 168 |
| orf178/rp16  | 181                             | 181       | 182                | 182 | 181   | 181                 | 181   | 181                   | 181 | 181       | 181                  | 181 | 181 | 181 | 181 | 181 | 181 | 181 | 181 | 181 | 181 | 181 | 181      | 181       | 181                  | 181                  | 181                  | 181                    | 181                   | 181                 | 181 |
| rp512        | 144                             | 144       | 149                | 149 | 156   | 153                 | 143   | 153                   | 143 | 143       | 139                  | 139 | 139 | 143 | 143 | 143 | 143 | 143 | 139 | 139 | 143 | 143 | 143      | 143       | 139                  | 174                  | 143                  | 139                    | 157                   | 143                 |     |
| rp513        | 237                             | 271       | 249                | 249 | 302   | 261                 | 261   | 261                   | 244 | 244       | 241                  | 241 | 241 | 241 | 241 | 241 | 241 | 241 | 241 | 241 | 241 | 241 | 241      | 241       | 241                  | 241                  | 241                  | 241                    | 241                   | 241                 | 241 |
| rp514        | 103                             | 103       | 103                | 103 | 103   | 103                 | 76    | 103                   | 105 | 105       | 102                  | 102 | 102 | 103 | 103 | 103 | 103 | 103 | 103 | 103 | 103 | 103 | 103      | 103       | 102                  | 105                  | 102                  | 183                    | 115                   | 105                 |     |
| rp519        | 68                              | 68        | 68                 | 68  | 92    | 92                  | 92    | 92                    | 69  | 69        | -                    | -   | -   | 66  | 66  | 66  | 66  | 66  | -   | -   | 66  | 66  | 66       | 66        | -                    | -                    | 66                   | -                      | -                     | 66                  |     |
| rp53         | 166                             | 166       | 165                | 165 | 381   | 368                 | 382   | 368                   | 127 | 127       | 125                  | 125 | 125 | 144 | 144 | 144 | 144 | 141 | 141 | 141 | 144 | 144 | 144      | 144       | 125                  | 127                  | 146                  | 139                    | 127                   | 127                 |     |
| yejR         | 120                             | 439       | nd                 | nd  | 453   | 190                 | 452   | 452                   | 432 | 432       | 429                  | 429 | 429 | 429 | 429 | 429 | 429 | 429 | 429 | 429 | 429 | 429 | 429      | 429       | 370                  | 429                  | 370                  | 370                    | 433                   | 429                 |     |
| Ymf56        | 105                             | 107       | 94                 | 94  | 106   | 106                 | 114   | 106                   | 82  | 82        | 189                  | 189 | 63  | 78  | 78  | 78  | 78  | 78  | 78  | 78  | 78  | 78  | 78       | 146       | 150                  | 103                  | 146                  | 78                     | 82                    |                     |     |
| Ymf57        | 100                             | 100       | 100                | 100 | 100   | 100                 | 100   | 100                   | 76  | 76        | 93                   | 93  | 93  | 77  | 76  | 77  | 76  | 77  | 76  | 77  | 77  | 77  | 77       | 77        | 77                   | 80                   | 80                   | 80                     | 80                    | 80                  |     |
| Ymf59        | 122                             | 122       | 122                | 122 | 128   | 128                 | 128   | 128                   | 116 | 116       | 113                  | 113 | 113 | 116 | 116 | 116 | 116 | 116 | 116 | 116 | 116 | 116 | 116      | 116       | 116                  | 116                  | 116                  | 116                    | 116                   | 116                 | 116 |
| Ymf61        | nd                              | nd        | nd                 | nd  | 186   | nd                  | 176   | 227                   | 185 | 185       | 228                  | 228 | 228 | 182 | 182 | 182 | 182 | 182 | 185 | 185 | 182 | 182 | 182      | 182       | 182                  | 182                  | 182                  | 185                    | 185                   | 179                 |     |
| Ymf63        | 538                             | 540       | 450                | 450 | 642   | 641                 | 647   | 641                   | 561 | 561       | 563                  | 563 | 563 | 561 | 561 | 561 | 561 | 561 | 561 | 561 | 561 | 561 | 561      | 561       | 561                  | 561                  | 561                  | 561                    | 561                   | 561                 | 561 |
| Ymf64/orf234 | 1,000                           | 863       | 442                | 288 | 1,614 | 1,742               | 1,679 | 1,783                 | 572 | 572       | 613                  | 613 | 613 | 666 | 666 | 666 | 666 | 666 | 666 | 666 | 666 | 666 | 666      | 666       | 557                  | 572                  | 668                  | 613                    | 619                   | 671                 |     |
| Ymf65/orf156 | 374                             | 365       | 370                | 370 | 371   | 366                 | 397   | 367                   | 365 | 365       | 423                  | 423 | 423 | 365 | 365 | 365 | 365 | 365 | 365 | 365 | 365 | 365 | 365      | 365       | 422                  | 365                  | 385                  | 434                    | 365                   | 365                 |     |
| Ymf66        | 428                             | 428       | 447                | 409 | 427   | 419                 | 427   | 427                   | 445 | 445       | 445                  | 445 | 445 | 466 | 466 | 466 | 466 | 456 | 413 | 413 | 466 | 466 | 466      | 466       | 429                  | 413                  | 428                  | 428                    | 398                   | 398                 |     |
| Ymf67        | 354                             | 354       | 344                | 344 | 354   | 354                 | 354   | 354                   | 366 | 378       | 348                  | 348 | 348 | 355 | 355 | 355 | 355 | 355 | 355 | 355 | 355 | 355 | 355      | 355       | 345                  | 345                  | 402                  | 345                    | 362                   | 355                 |     |
| Ymf68        | 387                             | 387       | 387                | 387 | 395   | 389                 | 389   | 389                   | 387 | 387       | 387                  | 387 | 387 | 387 | 387 | 387 | 387 | 387 | 387 | 387 | 387 | 387 | 387      | 387       | 387                  | 387                  | 390                  | 387                    | 387                   | 387                 |     |
| Ymf76/orf105 | 385                             | 385       | 405                | 405 | 405   | 405                 | 405   | 405                   | 61  | 369       | 405                  | 405 | 405 | 324 | 321 | 327 | 317 | 321 | 366 | 380 | 310 | 320 | 326      | 324       | 410                  | 372                  | 453                  | 409                    | 379                   | 441                 |     |
| Ymf78        | 72                              | 63        | 73                 | 73  | 69    | 73                  | 73    | 73                    | 72  | 72        | 122                  | 122 | 122 | 66  | 66  | 66  | 66  | 66  | 66  | 66  | 66  | 66  | 66       | 66        | 72                   | 72                   | 72                   | 70                     | 66                    | 66                  |     |
| Ymf79        | 78                              | 99        | 104                | 104 | 75    | 75                  | 75    | 75                    | 70  | 70        | 70                   | 70  | 70  | 70  | 70  | 70  | 70  | 70  | 70  | 70  | 70  | 70  | 70       | 70        | 70                   | 70                   | 70                   | 70                     | 70                    | 70                  |     |
| Ymf80        | -                               | 89        | 96                 | 96  | 90    | 92                  | 104   | 90                    | 89  | 89        | 89                   | 89  | 89  | 89  | 89  | 89  | 89  | 89  | 89  | 89  | 89  | 89  | 89       | 89        | 89                   | 89                   | 89                   | 89                     | 89                    | 89                  |     |
| Ymf83        | -                               | 167       | 172                | 172 | 192   | 172                 | 188   | 187                   | 166 | 166       | 250                  | 250 | 250 | 166 | 166 | 166 | 175 | 166 | 166 | 166 | 175 | 175 | 166      | 175       | 183                  | 166                  | 233                  | 166                    | 166                   | 250                 |     |
| Ymf84        | 188                             | 188       | 188                | 188 | 245   | 186                 | 186   | 186                   | 185 | 185       | 185                  | 185 | 185 | 185 | 185 | 185 | 185 | 185 | 185 | 185 | 185 | 185 | 185      | 185       | 185                  | 185                  | 185                  | 185                    | 185                   | 185                 | 188 |
| orf189       | -                               | -         | -                  | -   | -     | -                   | -     | -                     | -   | -         | 67                   | 67  | 67  | -   | -   | -   | -   | -   | -   | -   | -   | -   | -        | -         | -                    | -                    | -                    | -                      | -                     | -                   | -   |
| orf221       | -                               | -         | -                  | -   | -     | -                   | -     | -                     | 97  | 97        | 84                   | 84  | 84  | -   | -   | -   | -   | -   | -   | -   | -   | -   | -        | -         | 92                   | -                    | 129                  | 116                    | 90                    | -                   | -   |
| orf265       | -                               | -         | -                  | -   | -     | -                   | -     | -                     | -   | -         | -                    | -   | -   | -   | -   | -   | -   | -   | -   | -   | -   | -   | -        | -         | 88                   | -                    | -                    | -                      | -                     | -                   | -   |
| orf285       | -                               | -         | -                  | -   | -     | -                   | -     | -                     | -   | -         | 108                  | 108 | 108 | -   | -   | -   | -   | -   | -   | -   | -   | -   | -        | -         | -                    | -                    | -                    | -                      | -                     | -                   | -   |
| orf314       | -                               | -         | -                  | -   | -     | -                   | -     | -                     | -   | -         | 73                   | 73  | 73  | -   | -   | -   | -   | -   | -   | -   | -   | -   | -        | -         | -                    | -                    | -                    | -                      | -                     | -                   | -   |
| orf78        | -                               | -         | -                  | -   | -     | -                   | -     | -                     | -   | -         | -                    | -   | 138 | -   | -   | -   | -   | -   | -   | -   | -   | -   | -        | -         | -                    | -                    | -                    | -                      | -                     | -                   | -   |
| newORF       | 191                             | 191       | 192                | 192 | 191   | 191                 | 191   | 186                   | 191 | -         | 191                  | 191 | 191 | 191 | 191 | 191 | 191 | 191 | 191 | 132 | 191 | 191 | 191      | 191       | 191                  | 191                  | 191                  | 191                    | 191                   | 191                 | -   |

Supplementary Figure 10: Presence/absence of proteins encoded in mitochondrial genomes in species and individual isolates of species of the *Paramecium* genus. The numbers indicate the length of each protein in amino acids.

| mean_dS                              | <i>bi</i> | <i>tet</i> | <i>sex</i> | <i>oct</i> | <i>nov</i> | <i>dec</i> | <i>dodec</i> | <i>quadec</i> | <i>jenningsi</i> | <i>caudatum</i> | <i>caudatum C026</i> | <i>multimicronucleatum</i> |
|--------------------------------------|-----------|------------|------------|------------|------------|------------|--------------|---------------|------------------|-----------------|----------------------|----------------------------|
| <i>bi</i>                            | -         | -          | -          | -          | -          | -          | -            | -             | -                | -               | -                    | -                          |
| <i>tet</i>                           | 1.22      | -          | -          | -          | -          | -          | -            | -             | -                | -               | -                    | -                          |
| <i>sex</i>                           | 1.31      | 1.39       | -          | -          | -          | -          | -            | -             | -                | -               | -                    | -                          |
| <i>oct</i>                           | 1.17      | 0.93       | 1.42       | -          | -          | -          | -            | -             | -                | -               | -                    | -                          |
| <i>nov</i>                           | 1.07      | 1.18       | 1.41       | 1.20       | -          | -          | -            | -             | -                | -               | -                    | -                          |
| <i>dec</i>                           | 1.32      | 0.99       | 1.27       | 1.12       | 1.11       | -          | -            | -             | -                | -               | -                    | -                          |
| <i>dodec</i>                         | 1.20      | 0.94       | 1.30       | 1.04       | 1.23       | 0.85       | -            | -             | -                | -               | -                    | -                          |
| <i>quadec</i>                        | 1.19      | 1.27       | 1.29       | 1.20       | 1.06       | 1.24       | 1.21         | -             | -                | -               | -                    | -                          |
| <i>jenningsi</i>                     | 1.42      | 1.38       | 1.37       | 1.41       | 1.26       | 1.31       | 1.27         | 1.28          | -                | -               | -                    | -                          |
| <i>caudatum</i>                      | 2.30      | 2.56       | 2.45       | 2.39       | 2.77       | 2.56       | 2.44         | 2.62          | 2.61             | -               | -                    | -                          |
| <i>caudatum C026</i>                 | 4.86      | 2.48       | 2.37       | 2.53       | 2.48       | 2.46       | 5.05         | 2.48          | 2.45             | 1.36            | -                    | -                          |
| <i>multimicronucleatum</i>           | 2.75      | 2.69       | 2.80       | 2.71       | 2.85       | 2.77       | 2.73         | 2.71          | 2.76             | 7.69            | 5.12                 | -                          |
| <i>multimicronucleatum Peniche3I</i> | 2.67      | 2.88       | 2.79       | 2.57       | 2.84       | 2.86       | 2.69         | 2.76          | 2.79             | 4.95            | 2.45                 | 1.97                       |

Supplementary Figure 11: Mean pairwise  $dS$  between all *Paramecium* species. Species pairs with  $dS < 1.0$  are shown in shaded boxes.

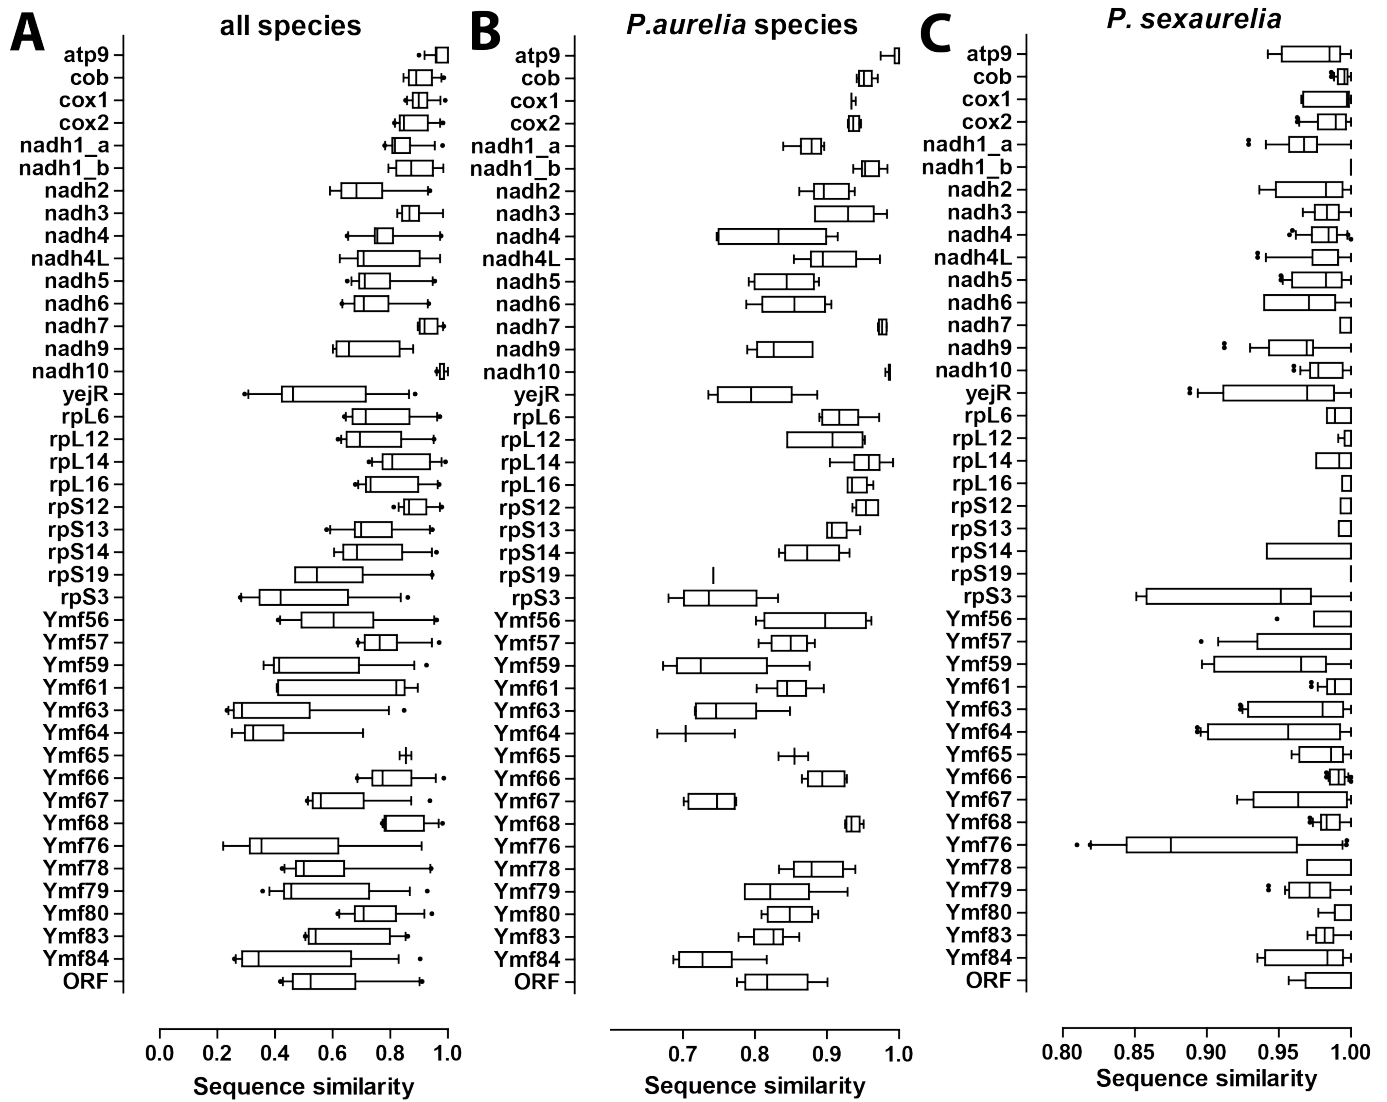

**Supplementary Figure 12: Conservation and divergence of mitochondrial protein sequences in the *Paramecium* genus.** Shown is the percent sequence identity for each protein within all species included in this study (A), within the *P. aurelia* species complex (B), and between the 11 individual *P. sexaurelia* isolates (C). Only one isolate per species was included in (A) and (B). The whiskers of the box plot correspond to the 5–95 percentile range.

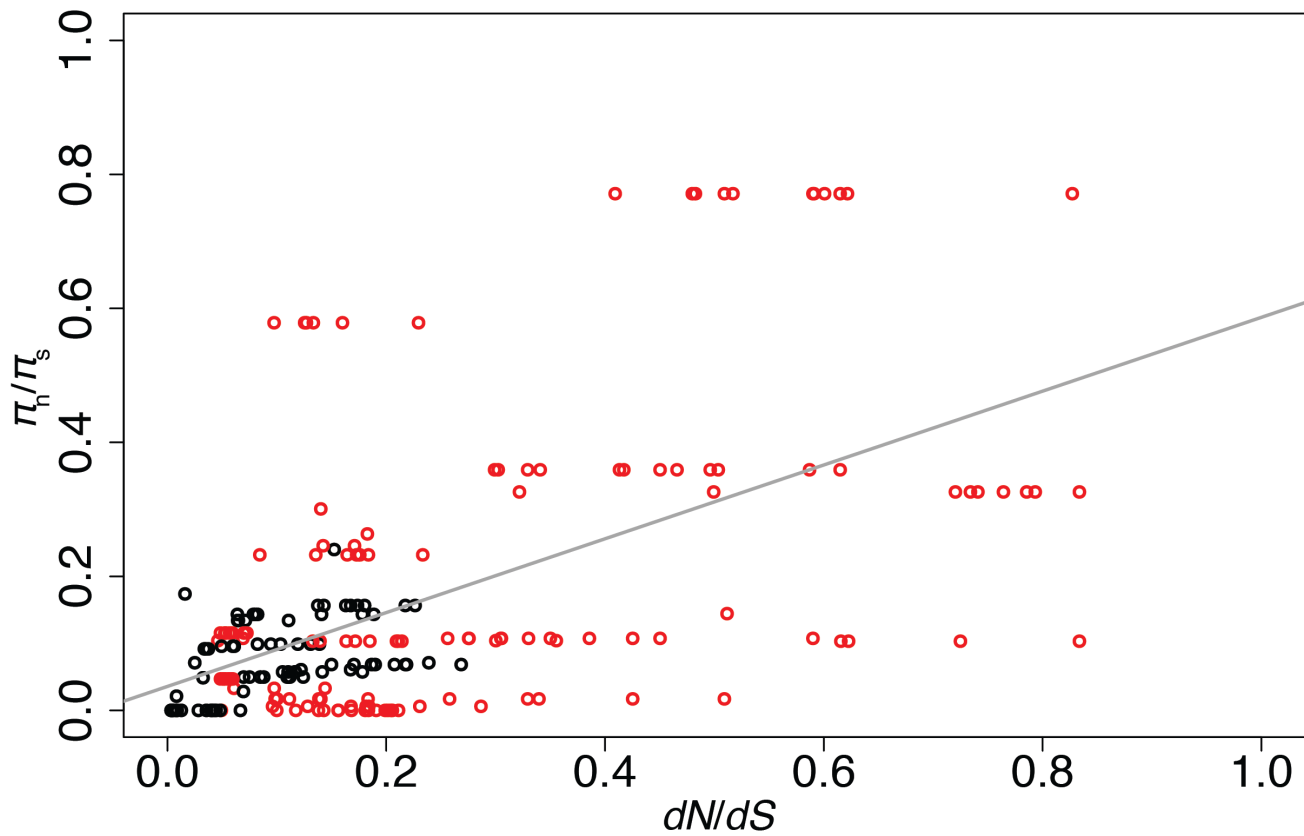

**Supplementary Figure 13: Relationship between observed  $\pi_n/\pi_s$  and pairwise  $dN/dS$  with respect to the closest outgroup species.** This analysis was performed for all protein-coding genes, with the conserved protein coding genes in black and the divergent *Ymf* genes indicated in red, for *P. tetraurelia*, *P. sexaurelia*, *P. caudatum* and *P. multimicronucleatum*. Only genes with  $dS < 1.0$  and  $\pi_s > 1$ , where  $\pi_s$  is the total number of polymorphic sites at synonymous positions, were used in this analysis, resulting in 208 total pairs of observations. This filter was executed in order to reduce errors in  $\pi_n/\pi_s$  due to very low values of synonymous polymorphisms in a gene.



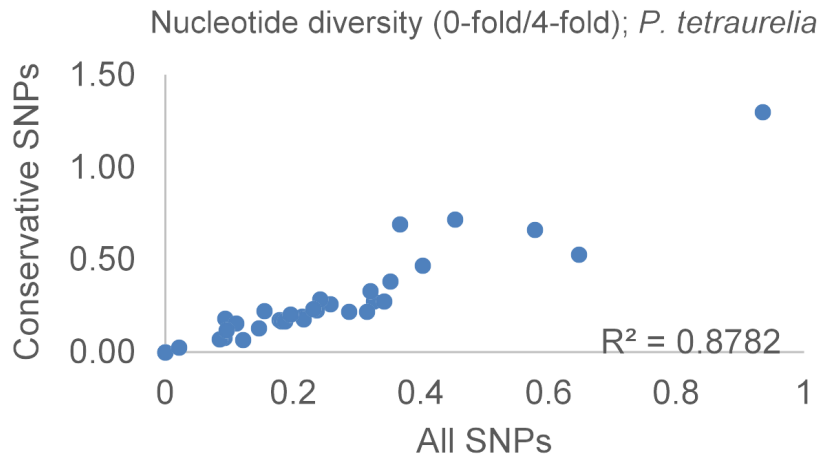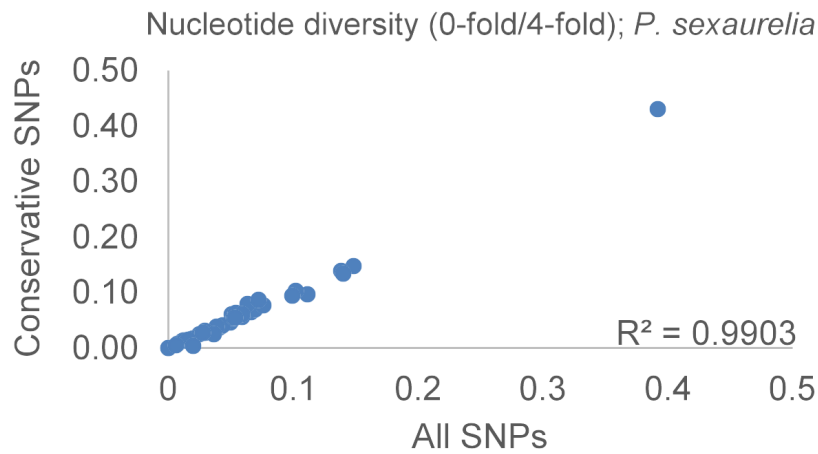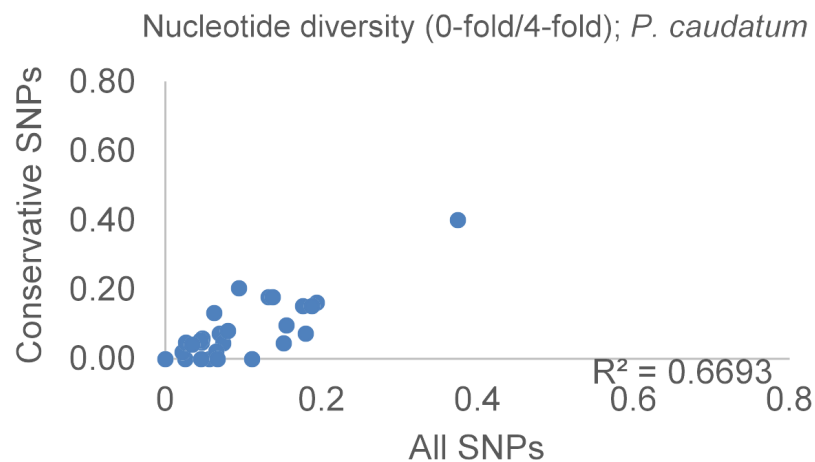

**Supplementary Figure 15: Correlation between nucleotide diversity estimates at 0-fold degenerate sites relative to that at 4-fold degenerate between all SNPs and a conservative set of SNPs (excluding all potential NUMT contaminants).**

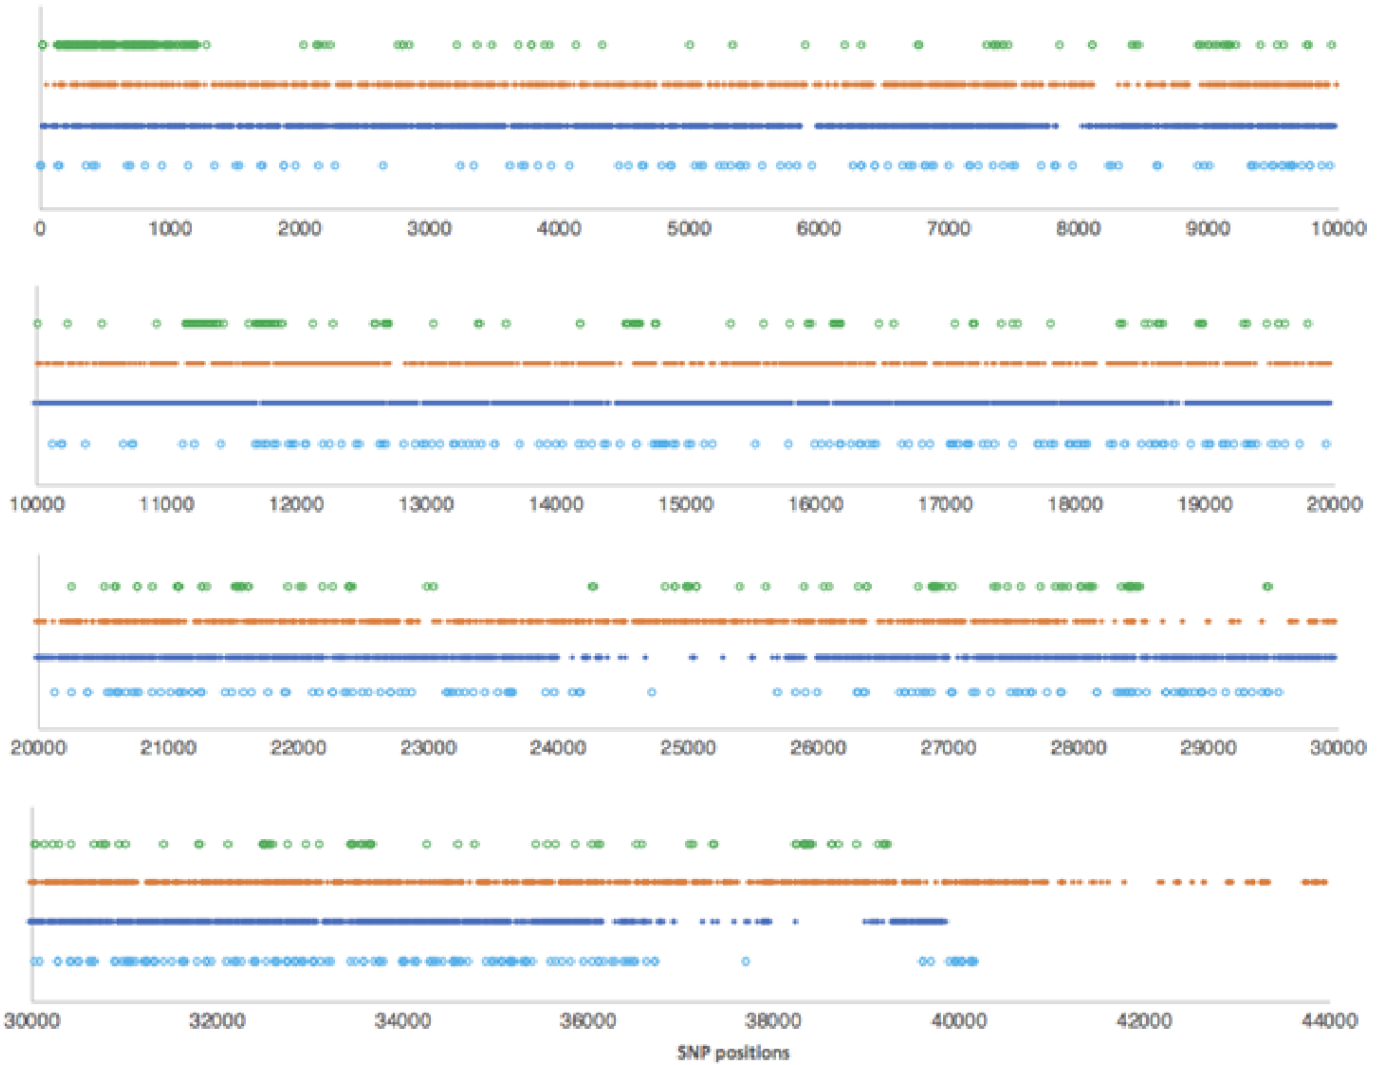

**Supplementary Figure 16: Distribution of SNP positions across mitochondrial genomes.** *P. tetraurelia* (light blue), *P. sexaurelia* (dark blue), *P. caudatum* (orange) and *P. multimicronucleatum* (green). Top panel covers positions 1–10,000, second panel shows positions 10,000–20,000, third panel shows positions 20,000–30,000, and last panel shows positions 30,000–44,000.

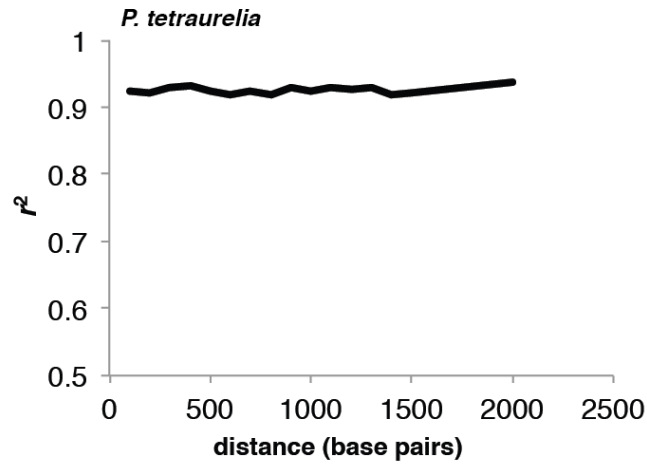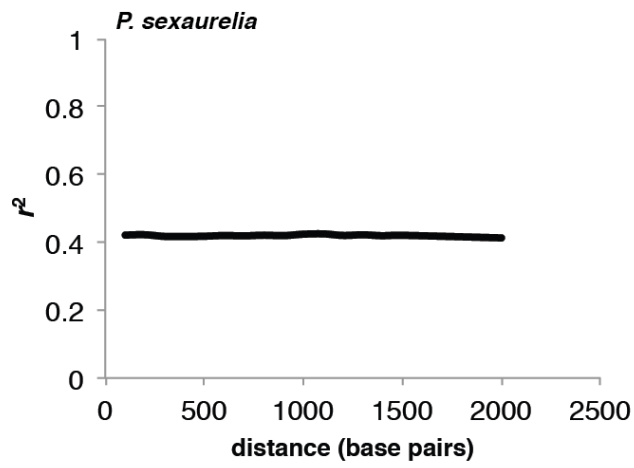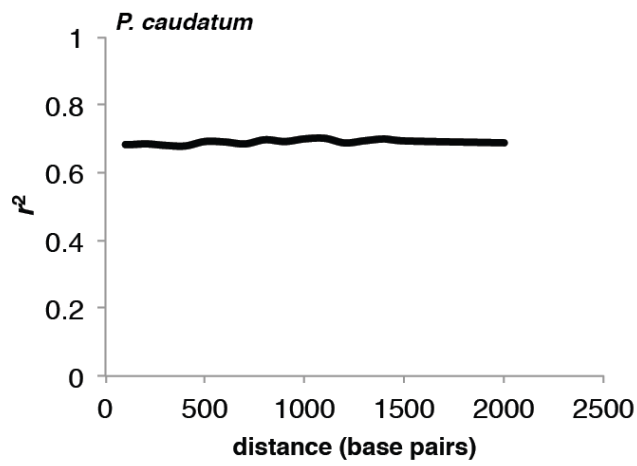

Supplementary Figure 17: Decay of linkage disequilibrium across the mitochondrial genomes of *P. tetraurelia*, *P. sexaurelia*, and *P. caudatum*.



## Supplementary Tables

**Supplementary Table 1:**  $dN/dS$  across the *Paramecium* phylogeny (sorted by lowest to highest value of  $dN/dS$ ).

| gene                           | $dN/dS$ |
|--------------------------------|---------|
| NADH dehydrogenase subunit 10  | 0.0071  |
| NADH dehydrogenase subunit 1 b | 0.0159  |
| NADH dehydrogenase subunit 7   | 0.0177  |
| ribosomal protein L14          | 0.0220  |
| apocytochrome b                | 0.0221  |
| Ymf68                          | 0.0234  |
| NADH dehydrogenase subunit 3   | 0.0296  |
| NADH dehydrogenase subunit 6   | 0.0305  |
| cytochrome c oxidase subunit 1 | 0.0337  |
| NADH dehydrogenase subunit 4   | 0.0338  |
| Ymf57                          | 0.0342  |
| Ymf80                          | 0.0347  |
| NADH dehydrogenase subunit 1 a | 0.0396  |
| ribosomal protein S12          | 0.0406  |
| cytochrome c oxidase subunit 2 | 0.0433  |
| ribosomal protein L16          | 0.0482  |
| ribosomal protein L12          | 0.0483  |
| Ymf66                          | 0.0491  |
| ribosomal protein L6           | 0.0522  |
| ribosomal protein S13          | 0.0544  |
| NADH dehydrogenase subunit 4L  | 0.0559  |
| NADH dehydrogenase subunit 5   | 0.0623  |
| NADH dehydrogenase subunit 2   | 0.0661  |
| Ymf79                          | 0.0663  |
| Ymf56                          | 0.0703  |
| Ymf78                          | 0.0805  |
| ribosomal protein S14          | 0.0818  |
| Ymf65                          | 0.0894  |
| Ymf61                          | 0.1018  |
| Ymf67                          | 0.1105  |
| NADH dehydrogenase subunit 9   | 0.1158  |
| Ymf84                          | 0.1200  |
| yejR                           | 0.1241  |
| Ymf59                          | 0.1476  |
| ribosomal protein S3           | 0.1574  |
| Ymf63                          | 0.1632  |
| ATP synthase F0 subunit 9      | 0.1781  |
| Ymf83                          | 0.1803  |
| Ymf76                          | 0.1962  |
| Ymf64                          | 0.2154  |

**Supplementary Table 2:** List of genes under positive selection in *P. sexaurelia* and *P. caudatum*. All p values are corrected for multiple tests by Holm method.

| <i>P. sexaurelia</i> |                        |                            |                       | <i>P. caudatum</i> |                       |                            |                       |
|----------------------|------------------------|----------------------------|-----------------------|--------------------|-----------------------|----------------------------|-----------------------|
| all sites included   |                        | Using well conserved sites |                       | all sites included |                       | Using well conserved sites |                       |
| gene                 | <i>p</i>               | gene                       | <i>p</i>              | gene               | <i>p</i>              | gene                       | <i>p</i>              |
| <i>Ymf64</i>         | $1.69 \times 10^{-13}$ | <i>Cox1</i>                | $5.01 \times 10^{-3}$ | <i>Ymf63</i>       | $5.71 \times 10^{-9}$ | <i>Ymf64</i>               | $3.48 \times 10^{-7}$ |
| <i>Ymf67</i>         | $2.71 \times 10^{-7}$  | <i>Ymf76</i>               | $9.49 \times 10^{-3}$ | <i>Ymf64</i>       | $2.12 \times 10^{-8}$ |                            |                       |
| <i>Ymf63</i>         | $3.56 \times 10^{-6}$  | <i>Ymf63</i>               | $2.99 \times 10^{-2}$ | <i>rpS3</i>        | $2.78 \times 10^{-4}$ |                            |                       |
| <i>Ymf84</i>         | $1.84 \times 10^{-5}$  |                            |                       | <i>Ymf59</i>       | $7.79 \times 10^{-3}$ |                            |                       |
| <i>Cox1</i>          | $2.28 \times 10^{-4}$  |                            |                       | <i>Ymf61</i>       | $1.18 \times 10^{-2}$ |                            |                       |
| <i>Nadh5</i>         | $3.58 \times 10^{-4}$  |                            |                       | <i>Ymf67</i>       | $2.65 \times 10^{-2}$ |                            |                       |
| <i>rpL6</i>          | $1.91 \times 10^{-3}$  |                            |                       |                    |                       |                            |                       |
| <i>yejR</i>          | $4.22 \times 10^{-3}$  |                            |                       |                    |                       |                            |                       |
| <i>Ymf65</i>         | $6.72 \times 10^{-3}$  |                            |                       |                    |                       |                            |                       |
| <i>rpS13</i>         | $8.23 \times 10^{-3}$  |                            |                       |                    |                       |                            |                       |
| <i>cox2</i>          | $1.05 \times 10^{-2}$  |                            |                       |                    |                       |                            |                       |
| <i>Ymf76</i>         | $2.72 \times 10^{-2}$  |                            |                       |                    |                       |                            |                       |
| <i>Ymf61</i>         | $2.79 \times 10^{-2}$  |                            |                       |                    |                       |                            |                       |

**Supplementary Table 3:** Mitochondrial mutations identified in *P. biaurelia* and *P. sexaurelia* MA experiments

| <i>P. biaurelia</i> |        |         | <i>P. sexaurelia</i> |        |         |
|---------------------|--------|---------|----------------------|--------|---------|
| position            | genome | variant | position             | genome | variant |
| 490                 | C      | A       | 1577                 | A      | G       |
| 606                 | C      | A       | 1645                 | T      | C       |
| 2646                | T      | A       | 3466                 | A      | T       |
| 2887                | T      | G       | 3790                 | A      | G       |
| 3155                | A      | G       | 4674                 | T      | A       |
| 3155                | A      | T       | 4742                 | T      | A       |
| 4779                | C      | A       | 4770                 | G      | A       |
| 4794                | G      | A       | 4847                 | A      | T       |
| 4811                | T      | G       | 5065                 | T      | A       |
| 7442                | A      | T       | 5417                 | A      | G       |
| 7498                | A      | G       | 6096                 | G      | A       |
| 7529                | T      | A       | 6454                 | T      | A       |
| 7728                | T      | A       | 6491                 | T      | A       |
| 7753                | T      | A       | 6635                 | G      | A       |
| 7979                | T      | A       | 6642                 | T      | A       |
| 7998                | A      | G       | 6903                 | A      | C       |
| 8071                | T      | A       | 7007                 | A      | G       |
| 8076                | T      | A       | 7424                 | A      | T       |
| 8077                | A      | T       | 7522                 | G      | A       |
| 13086               | T      | A       | 7538                 | G      | A       |
| 13140               | A      | C       | 7568                 | G      | A       |
| 17709               | T      | A       | 7721                 | T      | A       |
| 17709               | T      | C       | 7734                 | T      | A       |
| 17761               | T      | A       | 7858                 | A      | C       |
| 17787               | G      | A       | 8152                 | T      | A       |
| 17790               | C      | A       | 8172                 | T      | G       |
| 17841               | T      | A       | 8405                 | T      | C       |
| 17841               | T      | G       | 8439                 | A      | C       |
| 18090               | A      | T       | 8620                 | A      | G       |
| 22843               | T      | A       | 8850                 | T      | A       |
| 22843               | T      | G       | 9044                 | G      | A       |
| 22955               | A      | T       | 9955                 | A      | G       |
| 26509               | T      | A       | 10023                | T      | C       |

*Continued on next page*

Supplementary Table 3 – *Continued from previous page*

| <i>P. biaurelia</i> |        |         | <i>P. sexaurelia</i> |        |         |
|---------------------|--------|---------|----------------------|--------|---------|
| position            | genome | variant | position             | genome | variant |
| 26657               | T      | C       | 10382                | A      | G       |
| 26668               | A      | G       | 10444                | A      | G       |
| 26702               | T      | A       | 10919                | T      | A       |
| 26703               | T      | A       | 11283                | T      | A       |
| 26744               | C      | A       | 11900                | T      | A       |
| 26766               | G      | A       | 12902                | A      | G       |
| 26768               | T      | A       | 13649                | T      | C       |
| 28321               | T      | A       | 15256                | T      | A       |
| 28378               | T      | A       | 15771                | A      | T       |
| 28498               | T      | G       | 15786                | T      | C       |
| 32849               | T      | A       | 15799                | A      | G       |
| 32849               | T      | G       | 16239                | A      | G       |
| 33094               | T      | G       | 16394                | T      | C       |
| 33096               | T      | G       | 17103                | A      | T       |
| 33139               | A      | G       | 18194                | A      | G       |
| 35080               | T      | C       | 19729                | T      | G       |
| 35485               | T      | A       | 20044                | T      | G       |
| 35512               | A      | G       | 20398                | A      | G       |
| 35564               | T      | C       | 20529                | T      | C       |
| 35723               | C      | T       | 21060                | A      | G       |
| 37061               | G      | A       | 21204                | A      | T       |
| 37104               | T      | G       | 21423                | A      | T       |
|                     |        |         | 21615                | A      | T       |
|                     |        |         | 22111                | T      | C       |
|                     |        |         | 23241                | A      | G       |
|                     |        |         | 24268                | C      | T       |
|                     |        |         | 24806                | A      | G       |
|                     |        |         | 25196                | T      | C       |
|                     |        |         | 25199                | A      | C       |
|                     |        |         | 25227                | A      | G       |
|                     |        |         | 25290                | T      | A       |
|                     |        |         | 25347                | T      | A       |
|                     |        |         | 26548                | T      | A       |
|                     |        |         | 26672                | T      | G       |
|                     |        |         | 26934                | T      | A       |
|                     |        |         | 27174                | T      | C       |
|                     |        |         | 27714                | T      | G       |
|                     |        |         | 27924                | A      | C       |
|                     |        |         | 29490                | A      | T       |
|                     |        |         | 30667                | T      | C       |
|                     |        |         | 31217                | C      | T       |
|                     |        |         | 31870                | A      | G       |
|                     |        |         | 32870                | T      | G       |
|                     |        |         | 33090                | T      | A       |
|                     |        |         | 33794                | A      | G       |
|                     |        |         | 33800                | T      | G       |
|                     |        |         | 34300                | C      | T       |
|                     |        |         | 34334                | G      | A       |
|                     |        |         | 34348                | G      | A       |
|                     |        |         | 34736                | T      | A       |
|                     |        |         | 35045                | T      | A       |
|                     |        |         | 35700                | C      | T       |
|                     |        |         | 36667                | T      | A       |
|                     |        |         | 38460                | T      | A       |

**Supplementary Table 4:** Comparison of the total number and the overlap of SNP positions between the main SNP set and the stringent (excluding all possible NUMT contaminants) SNP set.

|                                                               | <i>P. tetraurelia</i> |                            | <i>P. sexaurelia</i> |                            | <i>P. caudatum</i> |                            | <i>P. multimicronucleatum</i> |                            |
|---------------------------------------------------------------|-----------------------|----------------------------|----------------------|----------------------------|--------------------|----------------------------|-------------------------------|----------------------------|
|                                                               | All SNPs              | Conservative SNPs          | All SNPs             | Conservative SNPs          | All SNPs           | Conservative SNPs          | All SNPs                      | Conservative SNPs          |
| Number of SNPs                                                | 510                   | 565                        | 5219                 | 5255                       | 2980               | 1393                       | 534                           | 350                        |
| Number of overlapping SNPs                                    | 508                   | 508                        | 5195                 | 5195                       | 1339               | 1339                       | 259                           | 259                        |
| Percentage overlap                                            | 99.6                  | 89.9                       | 99.5                 | 98.9                       | 44.9               | 96.1                       | 48.5                          | 74.0                       |
| Correlation of allele frequency ( $R^2$ )                     |                       | 0.93                       |                      | 0.84                       |                    | 0.39                       |                               | 0.63                       |
| Significance of correlation of allele frequency ( $p$ -value) |                       | $\leq 2.2 \times 10^{-16}$ |                      | $\leq 2.2 \times 10^{-16}$ |                    | $\leq 2.2 \times 10^{-16}$ |                               | $\leq 2.2 \times 10^{-16}$ |
| Average nucleotide diversity                                  | 0.0044                | 0.0060                     | 0.0496               | 0.0487                     | 0.0311             | 0.0157                     | 0.0055                        | 0.0060                     |

**Supplementary Table 5:** Summary of results obtained from LDhat (pairwise) to detect the presence of recombination in mitochondrial genomes of *Paramecium* species. The  $p$  values (not corrected for multiple tests) indicate whether values of statistics calculated on observed data are significantly different from the same values obtained for permuted SNPs.

| Model                         | $\theta$ | $p$ (Composite Likelihood Test) | $p$ (G4) | $p$ (correlation between $r^2$ and distance) | $p$ (correlation between $D'$ and distance) | $4N_e r$ (Hudson's method with finite sites) | $4N_e r$ (estimated following Wakely, 1997) |
|-------------------------------|----------|---------------------------------|----------|----------------------------------------------|---------------------------------------------|----------------------------------------------|---------------------------------------------|
| <i>P. tetraurelia</i>         |          |                                 |          |                                              |                                             |                                              |                                             |
| cross-over                    | 0.001    | 0.333                           | 0.000    | 0.194                                        | 0.000                                       | 0                                            | 0                                           |
|                               | 0.01     | 1.000                           | 0.000    | 0.211                                        | 0.000                                       | 0                                            | 0                                           |
| gene conversion               | 0.001    | 0.322                           | 0.000    | 0.559                                        | 0.043                                       | 0                                            | 0                                           |
|                               | 0.01     | 1.000                           | 0.000    | 0.549                                        | 0.043                                       | 0                                            | 0                                           |
| <i>P. sexaurelia</i>          |          |                                 |          |                                              |                                             |                                              |                                             |
| cross-over                    | 0.01     | 1.000                           | 0.965    | 0.980                                        | 1.000                                       | 0                                            | 0                                           |
|                               | 0.1      | 1.000                           | 0.974    | 0.971                                        | 1.000                                       | 0                                            | 0                                           |
| gene conversion               | 0.01     | 1.000                           | 0.107    | 0.043                                        | 0.990                                       | 0                                            | 0                                           |
|                               | 0.1      | 1.000                           | 0.099    | 0.050                                        | 0.998                                       | 0                                            | 0                                           |
| <i>P. caudatum</i>            |          |                                 |          |                                              |                                             |                                              |                                             |
| cross-over                    | 0.01     | 0.273                           | 1.000    | 0.995                                        | 0.998                                       | 0                                            | 0                                           |
|                               | 0.1      | 0.000                           | 1.000    | 0.998                                        | 0.999                                       | 0                                            | 0                                           |
| gene conversion               | 0.01     | 0.276                           | 1.000    | 1.000                                        | 1.000                                       | 0                                            | 0                                           |
|                               | 0.1      | 0.000                           | 1.000    | 1.000                                        | 1.000                                       | 0                                            | 0                                           |
| <i>P. multimicronucleatum</i> |          |                                 |          |                                              |                                             |                                              |                                             |
| cross-over                    | 0.01     | 0.236                           | 0.811    | 0.782                                        | 0.466                                       | 0                                            | 0                                           |
| gene conversion               | 0.01     | 0.225                           | 0.879    | 0.806                                        | 0.502                                       | 0                                            | 0                                           |

**Supplementary Table 6:** Comparison of neutrality indices between the mitochondrial and nuclear genes that encode for proteins that are part of the oxidative phosphorylation pathway and those that form the structural components of the ribosome..

|                         | Oxidative phosphorylation |                   |                       | Ribosomal proteins |                   |                       |
|-------------------------|---------------------------|-------------------|-----------------------|--------------------|-------------------|-----------------------|
|                         | $\pi_n/\pi_s$             | $P_N/P_S/D_N/D_S$ | $\pi_n/\pi_s/d_N/d_S$ | $\pi_n/\pi_s$      | $P_N/P_S/D_N/D_S$ | $\pi_n/\pi_s/d_N/d_S$ |
| <i>P. tetraurelia</i>   |                           |                   |                       |                    |                   |                       |
| Number of nuclear genes | 27                        | 13                | 14                    | 336                | 77                | 88                    |
| Mitochondrial           | 0.127                     | 0.781             | 2.384                 | 0.062              | 1.935             | 2.248                 |
| Nuclear                 | 0.200                     | 2.896             | 6.712                 | 0.092              | 0.737             | 1.653                 |
| $p$                     | 0.223                     | 0.285             | 0.422                 | 0.387              | 0.352             | 0.262                 |
| <i>P. sexaurelia</i>    |                           |                   |                       |                    |                   |                       |
| Number of nuclear genes | 22                        | 18                | 16                    | 429                | 119               | 138                   |
| Mitochondrial           | 0.124                     | 0.328             | 5.180                 | 0.035              | 0.089             | 0.754                 |
| Nuclear                 | 0.146                     | 1.243             | 7.579                 | 0.158              | 1.047             | 3.759                 |
| $p$                     | 0.535                     | 0.444             | 0.145                 | 0.093              | 0.124             | 0.308                 |
| <i>P. caudatum</i>      |                           |                   |                       |                    |                   |                       |
| Number of nuclear genes | 12                        | 3                 | –                     | 422                | 9                 | –                     |
| Mitochondrial           | 0.105                     | 0.364             | –                     | 0.067              | 0.051             | –                     |
| Nuclear                 | 0.133                     | 0.211             | –                     | 0.133              | 0.260             | –                     |
| $p$                     | 0.726                     | 0.107             | –                     | 0.513              | 0.650             | –                     |

**Supplementary Table 7:** Neutrality indices (defined in the Methods section) in the mitochondria of *Paramecium* species (divergence estimated using all 13 taxa)

|                                                                          | <i>P. tetraurelia</i> |                        | <i>P. seaurelia</i> |                        | <i>P. caudatum</i> |                        |
|--------------------------------------------------------------------------|-----------------------|------------------------|---------------------|------------------------|--------------------|------------------------|
|                                                                          | <i>NI</i><br>[SD]     | <i>NI<sub>TG</sub></i> | <i>NI</i><br>[SD]   | <i>NI<sub>TG</sub></i> | <i>NI</i><br>[SD]  | <i>NI<sub>TG</sub></i> |
| All mitochondrial genes                                                  | 1.521<br>[2.031]      | 0.765                  | 0.281<br>[0.475]    | 0.213                  | 0.500<br>[0.592]   | 0.314                  |
| Excluding <i>Ymf</i> genes                                               | 1.794<br>[2.515]      | 0.690                  | 0.339<br>[0.601]    | 0.265                  | 0.645<br>[0.706]   | 0.403                  |
| All mitochondrial genes with <i>dS</i> < 1.0                             | 1.379<br>[1.454]      | 0.829                  | 0.539<br>[0.843]    | 0.371                  | 0.513<br>[0.618]   | 0.314                  |
| All mitochondrial genes with <i>dS</i> < 1.0, excluding <i>Ymf</i> genes | 1.607<br>[1.890]      | 0.715                  | 0.859<br>[1.211]    | 0.495                  | 0.674<br>[0.894]   | 0.253                  |

**Supplementary Table 8:** Number of nuclear DNA repair-associated genes in *Paramecium* species

| Repair-related genes                                   | Number of gene copies: |                       |                     |                     |
|--------------------------------------------------------|------------------------|-----------------------|---------------------|---------------------|
|                                                        | <i>P. caudatum</i>     | <i>P. tetraurelia</i> | <i>P. biaurelia</i> | <i>P. seaurelia</i> |
| ALKYLATED DNA REPAIR PROTEIN ALKB-RELATED              | 1                      | 2                     | 1                   | 2                   |
| DNA CROSS-LINK REPAIR PROTEIN PSO2/SNM1                | 1                      | 2                     | 2                   | 2                   |
| DNA-DAMAGE REPAIR PROTEIN DRT111                       |                        | 1                     | 4                   | 1                   |
| DNA MISMATCH REPAIR MUTS RELATED PROTEINS              | 2                      | 2                     | 2                   | 2                   |
| DNA MISMATCH REPAIR PROTEIN MLH1                       | 1                      | 1                     | 1                   |                     |
| DNA MISMATCH REPAIR PROTEIN PMS1                       | 1                      | 1                     | 1                   | 1                   |
| DNA REPAIR AND RECOMBINATION PROTEIN RAD54B            |                        | 1                     | 1                   | 2                   |
| DNA REPAIR DEAD HELICASE RAD3/XP-D SUBFAMILY MEMBER    |                        | 1                     |                     | 1                   |
| DNA REPAIR ENDONUCLEASE XPF                            | 1                      | 1                     | 1                   | 1                   |
| DNA REPAIR HELICASE RAD3/XP-D                          | 1                      | 3                     | 2                   |                     |
| DNA REPAIR POLYMERASE UMUC / TRANSFERASE FAMILY MEMBER |                        | 1                     |                     |                     |
| DNA REPAIR PROTEIN RAD51                               | 1                      | 2                     | 2                   | 2                   |
| DNA REPAIR PROTEIN XP-C / RAD4                         | 1                      | 2                     | 2                   | 1                   |
| DNA REPAIR/TRANSCRIPTION PROTEIN MET18/MMS19           | 1                      | 1                     | 1                   | 1                   |
| DOUBLE-STRAND BREAK REPAIR PROTEIN MRE11A              | 1                      | 2                     | 2                   | 2                   |
| EXCISION REPAIR CROSS-COMPLEMENTING 1 ERCC1            |                        | 1                     |                     |                     |
| RAD25/XP-B DNA REPAIR HELICASE                         |                        | 2                     |                     |                     |
| UV EXCISION REPAIR PROTEIN RAD23                       | 3                      | 6                     | 7                   | 6                   |
| XP-G/RAD2 DNA REPAIR ENDONUCLEASE FAMILY               |                        | 1                     | 1                   | 1                   |
| DNA-REPAIR PROTEIN XP-G                                | 1                      |                       |                     |                     |
| RAD25/XP-B DNA REPAIR HELICASE                         | 2                      |                       | 2                   | 2                   |
| DNA REPAIR PROTEIN RECN                                |                        |                       | 1                   |                     |
| NUCLEOTIDE EXCISION REPAIR COMPLEX SUBUNIT UVRC        |                        |                       | 1                   |                     |
